# Supplementary material for: Associations Between High-Density Lipoprotein Particles and Ischemic Events by Vascular Domain, Sex, and Ethnicity: A Pooled Cohort Analysis
Source: PubMed Central journal article supplement — Circulation. 2020 Jun 18;142(7):657–69. doi: 10.1161/CIRCULATIONAHA.120.045713 (PMC7425196; doi:10.1161/circulationaha.120.045713), 2020-06-18
Supplement: cir-142-657-s001.pdf [file cir-142-657-s001.pdf]

## SUPPLEMENTAL MATERIAL

Supplementary Figure I: Scatter plots displaying the spread between HDL-C measured enzymatically and HDL-C derived by NMR LP3 deconvolution algorithm for ARIC, DHS, MESA and PREVEND with Spearman's rank correlation coefficients.

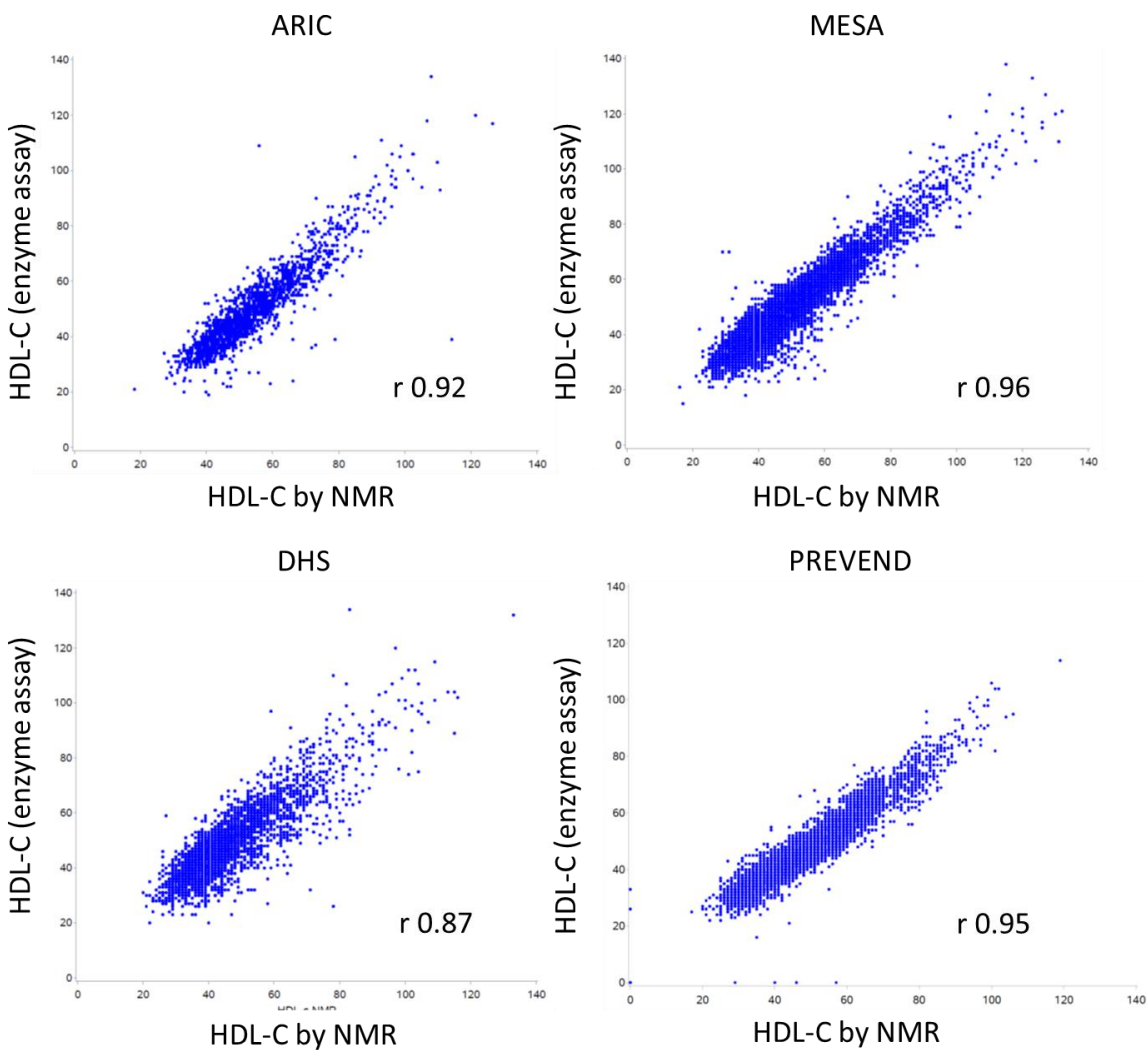

HDL-C=high density lipoprotein concentration; NMR=nuclear magnetic resonance;

ARIC=Atherosclerosis Risk in Communities Study; DHS=Dallas Heart Study;

MESA=Multi-Ethnic Study of Atherosclerosis; PREVEND=Prevention of Renal and Vascular End-stage Disease

Supplementary Table I: Quartiles of HDL-C and HDL-P used for analyses in the overall population. Median values are reported with interquartile intervals in parenthesis.

Quartiles reported are race- and sex-specific.

| <b>Quartiles of HDL-C in overall population</b> |                                   |                                   |                                   |                                   |
|-------------------------------------------------|-----------------------------------|-----------------------------------|-----------------------------------|-----------------------------------|
|                                                 | <b>Quartile 1 (Q1)<br/>n=4381</b> | <b>Quartile 2 (Q2)<br/>n=4388</b> | <b>Quartile 3 (Q3)<br/>n=4264</b> | <b>Quartile 4 (Q4)<br/>n=4416</b> |
| HDL-C (mg/dL)                                   | 36<br>(32.8-40.3)                 | 45.2<br>(40-49)                   | 53<br>(46-57)                     | 65<br>(57.7-72.8)                 |
| HDL-P (µmol/L)                                  | 28.3<br>(25.5-31.4)               | 31.4<br>(28.5-34.4)               | 33.6<br>(30.7-37.2)               | 37.2<br>(33.6-41.3)               |
| HDL size (nm)                                   | 8.8<br>(8.6-9.0)                  | 9.0<br>(8.7-9.3)                  | 9.2<br>(8.9-9.6)                  | 9.7<br>(9.3-9.9)                  |
| <b>Quartiles of HDL-P in overall population</b> |                                   |                                   |                                   |                                   |
|                                                 | <b>Quartile 1 (Q1)<br/>n=4353</b> | <b>Quartile 2 (Q2)<br/>n=4377</b> | <b>Quartile 3 (Q3)<br/>n=4365</b> | <b>Quartile 4 (Q4)<br/>n=4368</b> |
| HDL-C (mg/dL)                                   | 39<br>(34.1-45.1)                 | 45.6<br>(40.0-52.8)               | 50<br>(43.9-58.0)                 | 58<br>(50.0-68.0)                 |
| HDL-P (µmol/L)                                  | 26.5<br>(24.6-28.3)               | 30.9<br>(29.1-32.6)               | 34.7<br>(32.4-36.5)               | 40.1<br>(37.2-43.2)               |
| HDL size (nm)                                   | 8.9<br>(8.6-9.3)                  | 9.1<br>(8.7-9.5)                  | 9.2<br>(8.8-9.6)                  | 9.3<br>(9.0-9.6)                  |

HDL-C=high density lipoprotein concentration; HDL-P=high density lipoprotein particle concentration.

Supplementary Table II: Quartiles of HDL-C divided by race and gender. Median values are reported with interquartile intervals in parenthesis. Quartiles reported are race- and sex-specific.

| <b>Quartiles of HDL-C (mg/dL) by gender</b> |                        |                        |                        |                        |
|---------------------------------------------|------------------------|------------------------|------------------------|------------------------|
|                                             | <b>Quartile 1 (Q1)</b> | <b>Quartile 2 (Q2)</b> | <b>Quartile 3 (Q3)</b> | <b>Quartile 4 (Q4)</b> |
| Women                                       | 40<br>(37.0-43.0)      | 49<br>(47.0-51.0)      | 57<br>(54.9-59.0)      | 70<br>(65.0-78.0)      |
| Men                                         | 33<br>(31.0-35.0)      | 40<br>(38.3-41.0)      | 46<br>(44.0-48.0)      | 57<br>(53.0-63.1)      |
| <b>Quartiles of HDL-C (mg/dL) by race</b>   |                        |                        |                        |                        |
|                                             | <b>Quartile 1 (Q1)</b> | <b>Quartile 2 (Q2)</b> | <b>Quartile 3 (Q3)</b> | <b>Quartile 4 (Q4)</b> |
| White                                       | 35.6<br>(32.2-40.0)    | 45.0<br>(39.7-49.0)    | 53<br>(45.6-56.9)      | 64.1<br>(56.4-71.9)    |
| Black                                       | 37<br>(34.0-41.0)      | 46<br>(42.0-50.0)      | 55<br>(50.0-59.0)      | 67<br>(64.0-77.0)      |

HDL-C=high density lipoprotein concentration.

Supplementary Table III: Quartiles of HDL-P divided by race and gender. Median values are reported with interquartile intervals in parenthesis. Median values are reported with interquartile intervals in parenthesis.

| <b>Quartiles of HDL-P (<math>\mu\text{mol/L}</math>) by gender</b> |                        |                        |                        |                        |
|--------------------------------------------------------------------|------------------------|------------------------|------------------------|------------------------|
|                                                                    | <b>Quartile 1 (Q1)</b> | <b>Quartile 2 (Q2)</b> | <b>Quartile 3 (Q3)</b> | <b>Quartile 4 (Q4)</b> |
| Women                                                              | 28.1<br>(26.4-29.5)    | 32.5<br>(31.7-33.5)    | 36.4<br>(35.3-37.4)    | 42.0<br>(40.2-45.2)    |
| Men                                                                | 25.2<br>(23.5-26.3)    | 29.0<br>(28.2-29.8)    | 32.3<br>(31.4-33.1)    | 37<br>(35.3-39.6)      |
| <b>Quartiles of HDL-P (<math>\mu\text{mol/L}</math>) by race</b>   |                        |                        |                        |                        |
|                                                                    | <b>Quartile 1 (Q1)</b> | <b>Quartile 2 (Q2)</b> | <b>Quartile 3 (Q3)</b> | <b>Quartile 4 (Q4)</b> |
| White                                                              | 26.5<br>(24.7-28.4)    | 30.9<br>(29.0-32.7)    | 34.5<br>(32.2-36.4)    | 39.9<br>(36.9-43.0)    |
| Black                                                              | 26.4<br>(24.4-28.0)    | 31.1<br>(29.9-32.6)    | 35.0<br>(33.4-36.8)    | 40.9<br>(39.0-43.7)    |

HDL-P=high density lipoprotein particle concentration.

Supplementary Table IV: Hazard ratios of quartiles of HDL-size and HDL-C/HDL-P.

|                    | Outcome         | Hazard ratio Q4 vs Q1 | 95% CI    |
|--------------------|-----------------|-----------------------|-----------|
| <b>HDL size</b>    | Ischemic Stroke | 1.05                  | 0.75-1.47 |
|                    | MI              | 0.86                  | 0.66-1.13 |
|                    | Stroke + MI     | 0.89                  | 0.72-1.11 |
|                    | Composite       | 0.91                  | 0.77-1.09 |
| <b>HDL-C/HDL-P</b> | Ischemic Stroke | 1.00                  | 0.72-1.39 |
|                    | MI              | 1.03                  | 0.79-1.35 |
|                    | Stroke + MI     | 0.99                  | 0.80-1.23 |
|                    | Composite       | 1.00                  | 0.84-1.20 |

MI=myocardial infarction; HDL-C=high density lipoprotein concentration; HDL-P=high density lipoprotein particle concentration

Supplementary Table V: Hazard ratios of HDL-size/HDL-P and 1/HDL-P with CV events.

Cox proportional hazards models of quartile 4 (Q4) vs quartile 1 (Q1) of HDL-size/HDL-P and the inverse ratio of HDL-P for stroke, MI and composite ASCVD outcomes in the overall population. This model is adjusted for risk factors (age, race, gender, diabetes, hypertension, smoking, LDL-C, triglycerides, BMI, waist circumference and hs-CRP) as well as cohorts.

|                 |                 | <b>HDL-size/HDL-P<br/>HR Q4 vs Q1 (95% CI)</b> | <b>1/HDL-P<br/>HR Q4 vs Q1 (95% CI)</b> |
|-----------------|-----------------|------------------------------------------------|-----------------------------------------|
| <b>Outcomes</b> | Ischemic Stroke | 1.45 (1.05 -2.01)                              | 1.52 (1.09-2.12)                        |
|                 | MI              | 1.59 (1.23-2.07)                               | 1.57 (1.22-2.01)                        |
|                 | Stroke + MI     | 1.54 (1.26-1.90)                               | 1.56 (1.27-1.92)                        |
|                 | Composite       | 1.51 (1.28-1.78)                               | 1.56 (1.33-1.84)                        |

MI=myocardial infarction; HDL-size=high density lipoprotein size; HDL-P=high density lipoprotein particle concentration; HR=hazard ratio; CI=confidence interval.
